# Supplementary material for: LTR retrotransposon-derived novel lncRNA2 enhances cold tolerance in Moso bamboo by modulating antioxidant activity and photosynthetic efficiency
Source: PeerJ journal article supplement (doi:10.7717/peerj.19056), 2025-02-26
Supplement: MIQE_checklist.xls [file MIQE_checklist.xls]

## Sheet: Sheet1
ITEM TO CHECK	IMPORTANCE	CHECKLIST
EXPERIMENTAL DESIGN
Definition of experimental and control groups	E	Supplemental_Table_S8 3-12
Number within each group	E	Supplemental_Table_S8 3-12
Assay carried out by core lab or investigator's lab?	D
Acknowledgement of authors' contributions	D
SAMPLE
Description	E	Supplemental_Table_S8 14-23
Volume/mass of sample processed	D
Microdissection or macrodissection	E	macrodissection
Processing procedure	E	Supplemental_Table_S8 25
If frozen - how and how quickly?	E	Supplemental_Table_S8 25
If fixed - with what, how quickly?	E	Supplemental_Table_S8 25
Sample storage conditions and duration (especially for FFPE samples)	E	Supplemental_Table_S8 14-23
NUCLEIC ACID EXTRACTION
Procedure and/or instrumentation	E	Supplemental_Table_S8 27-67
Name of kit and details of any modifications	E	Supplemental_Table_S8 28
Source of additional reagents used	D
Details of DNase or RNAse treatment	E	Supplemental_Table_S8 69-71
Contamination assessment (DNA or RNA)	E	Supplemental_Table_S8 73-97
Nucleic acid quantification	E	Good quality, non-degraded
Instrument and method	E
Purity (A260/A280)	D
Yield	D
RNA integrity method/instrument	E	Supplemental_Table_S8 73-97
RIN/RQI or Cq of 3' and 5' transcripts	E	Supplemental_Table_S5
Electrophoresis traces	D
Inhibition testing (Cq dilutions, spike or other)	E	Cq dilutions
REVERSE TRANSCRIPTION
Complete reaction conditions	E	Supplemental_Table_S8 99-101
Amount of RNA and reaction volume	E	Supplemental_Table_S8 102-103
Priming oligonucleotide (if using GSP) and concentration	E	Supplemental_Table_S8 104-105
Reverse transcriptase and concentration	E	Supplemental_Table_S8 106-107
Temperature and time	E	Supplemental_Table_S8 102-103
Manufacturer of reagents and catalogue numbers	D
Cqs with and without RT	D*
Storage conditions of cDNA	D
qPCR TARGET INFORMATION
If multiplex, efficiency and LOD of each assay.	E	exclude
Sequence accession number	E	Supplemental_Table_S8 111
Location of amplicon	D
Amplicon length	E	Supplemental_Table_S8 111
In silico specificity screen (BLAST, etc)	E	specificity
Pseudogenes, retropseudogenes or other homologs?	D
Sequence alignment	D
Secondary structure analysis of amplicon	D
Location of each primer by exon or intron (if applicable)	E	exon
What splice variants are targeted?	E
qPCR OLIGONUCLEOTIDES
Primer sequences	E	Supplemental_Table_S8 111
RTPrimerDB Identification Number	D
Probe sequences	D**
Location and identity of any modifications	E	Supplemental_Table_S8 111
Manufacturer of oligonucleotides	D
Purification method	D
qPCR PROTOCOL
Complete reaction conditions	E	Supplemental_Table_S8 113-116
Reaction volume and amount of cDNA/DNA	E	Supplemental_Table_S8 121
Primer, (probe), Mg++ and dNTP concentrations	E	10μM
Polymerase identity and concentration	E	Supplemental_Table_S8 117-120
Buffer/kit identity and manufacturer	E	Supplemental_Table_S8 117-118
Exact chemical constitution of the buffer	D
Additives (SYBR Green I, DMSO, etc.)	E	Supplemental_Table_S8 117-120
Manufacturer of plates/tubes and catalog number	D
Complete thermocycling parameters	E	Supplemental_Table_S8 121
Reaction setup (manual/robotic)	D
Manufacturer of qPCR instrument	E	Supplemental_Table_S8 113-116
qPCR VALIDATION
Evidence of optimisation (from gradients)	D
Specificity (gel, sequence, melt, or digest)	E	sequence，Supplemental_Table_S8 127-133
For SYBR Green I, Cq of the NTC	E	Supplemental_Table_S5
Standard curves with slope and y-intercept	E
PCR efficiency calculated from slope	E
Confidence interval for PCR efficiency or standard error	D
r2 of standard curve	E
Linear dynamic range	E
Cq variation at lower limit	E
Confidence intervals throughout range	D
Evidence for limit of detection	E
If multiplex, efficiency and LOD of each assay.	E
DATA ANALYSIS
qPCR analysis program (source, version)	E	Supplemental_Table_S8 135-136
Cq method determination	E	Supplemental_Table_S8 138
Outlier identification and disposition	E	Supplemental_Table_S8 140-141
Results of NTCs	E
Justification of number and choice of reference genes	E	Supplemental_Table_S8 147-157
Description of normalisation method	E	Supplemental_Table_S8 159-161
Number and concordance of biological replicates	D
Number and stage (RT or qPCR) of technical replicates	E	3
Repeatability (intra-assay variation)	E	3
Reproducibility (inter-assay variation, %CV)	D
Power analysis	D
Statistical methods for result significance	E	Supplemental_Table_S8 143
Software (source, version)	E	Supplemental_Table_S8 145
Cq or raw data submission using RDML	D
Table 1. MIQE checklist for authors, reviewers and editors. All essential information (E) must be submitted with the manuscript. Desirable
information (D) should be submitted if available. If using primers obtained from RTPrimerDB, information on qPCR target, oligonucleotides,
protocols and validation is available from that source.
*: Assessing the absence of DNA using a no RT assay is essential when first extracting RNA. Once the sample has been validated as
RDNA-free, inclusion of a no-RT control is desirable, but no longer essential.
**: Disclosure of the probe sequence is highly desirable and strongly encouraged. However, since not all commercial pre-designed assay
vendors provide this information, it cannot be an essential requirement. Use of such assays is advised against.
