# Supplementary material for: LTR retrotransposon-derived novel lncRNA2 enhances cold tolerance in Moso bamboo by modulating antioxidant activity and photosynthetic efficiency
Source: PeerJ journal article supplement (doi:10.7717/peerj.19056), 2025-02-26
Supplement: Supplemental_Table_S1.xlsx [file Supplemental_Table_S1.xlsx]

## Sheet: Sheet1
Table S1 The primers used in quantitative real-time PCR.
Name	Primers	Sequence	Length	GC%	Tm℃	Product length（bp）
Pe-TElncRNA2	Y3-F	AGCTACACGCCCGTACCA	18	61.1	60.68	232
	Y3-R	GGACCAAGTCCACCGAGC	18	66.6	60.05
FZR2	G0260-F	ACTGTTTGTTCCGTGGGTTG	20	50	58.9	229
	G0260-R	TGCTAACATAGTCGCCCTGA	20	50	58.52
NOT3	G0060-F	TGAATCGGCACCACAAACAC	20	50	58.4	158
	G0060-R	TGGCTGCTGAGGTAGGAACA	20	55	60.4
ABCG44	G0200-F	TCCACCAGCCTAGCATTGAC	20	55	59.1	234
	G0200-R	CTTCTGCGAAACTGACACCC	20	55	58.1
AGD6	G0280-F	GGAGGATGGCGGAGAACGAG	20	65	61.6	181
	G0280-R	CAGATGCTGCAACTAGCGAAA	21	48	58.1
PheACT	PheACT-F	CAGCAACTGGGATGATATGGAGAA	24	46	63.1
	PheACT-R	TGGCAACGTACATAGCAGGAGTGT	24	50	63.7
PheEFla	PheEFla-F	CGCTGAGATGAACAAGAGGTCG	22	55	62.3
	PheEFla-R	CGGTGGTGGAGTCAATGATGAG	22	55	62.4
NTB	NTB-F	TCTTGTTTGACACCGAAGAGGAG	23	47.8	61.6	133
	NTB-R	AATAGCTGTCCCTGGAGGAGTTT	23	47.8	60.5
Pe-TElncRNA2-full lenght	lnc2-F	TCCGACCTCGCCGCCGGCCA	20	80	72	522
	lnc2-R	GAAATTTGAAACACCCAATT	20	30	52
AtACTIN2	AtACTIN2-F	GGTAACATTGTGCTCAGTGGTGG	23	52.2	61.9	108
	AtACTIN2-R	AACGACCTTAATCTTCATGCTGC	23	43.5	60.6
AT4G22910	AtFZR2-F	ATGGGGTTCATCGGTTCTGT	20	50	58.8	164
	AtFZR2-R	CGTTTCCACCAGATGCTAGC	20	55	58.2
AT5G18230	AtNOT3-F	TGCGCTCAGAAGAATCCTCA	20	50	59.1	170
	AtNOT3-R	TCGTTACCACCAGCTTCCAT	20	50	57.9
AT1G15520	AtABCG44-F	CGTCAGCATCTCAAGTTCGG	20	55	59.01	200
	AtABCG44-R	AAGGCCTGCACCATTCTTTG	20	50	60
AT1G53710	AtAGD6-F	GTGCTTCCATTTGAGCCACA	20	50	59.1	206
	AtAGD6-R	CCGGCAAGAACATCCATCAG	20	55	61
Identification	pUBQ10-F	GCACACACGAGTCGTGTTTATC	22	50	58.1	1870
	pUBQ10-R	GTGGTGCAGATGAACTTCAGG	21	52.4	57.7
Identification	pER8-F	GTGTCAAATCGTGGCCTC	18	55.6	53.4	600
	pER8-R	GTAGTGTATTGACCGATTCC	20	45	50
