# Supplementary material for: LTR retrotransposon-derived novel lncRNA2 enhances cold tolerance in Moso bamboo by modulating antioxidant activity and photosynthetic efficiency
Source: PeerJ journal article supplement (doi:10.7717/peerj.19056), 2025-02-26
Supplement: Supplemental_Table_S2.docx [file Supplemental_Table_S2.docx]

**Table S2 Full-length sequence of *Pe-TElncRNA2***

>*Pe-TElncRNA2* geneID=MSTRG.1287188.1 PH01004968 16954-17569

TCCGACCTCGCCGCCGGCCACCACCGTCCACCTCAACCACCCGGAGGTACCTCATCGTGTTCGCAATAGCGTCAGCTACACGCCCGTACCACCCACCCTCGCCGGCGAGCACTGTAGCGCCGGTGACCATCGGGTCCAGTGCCGCCGCCGTCGTTGTCGTCCTCGCCGACGTGGACGCCACGTCACCTGCCACCTCACCCTCCGTGCGTGCGTGTCAGCCACGTGTGCGCCGCGTCAGCGCCACGCGCGCGCGGGTGCGCCACGCCAGCACCGTTTCAAATCCAGTGGCTCGGTGGACTTGGTCCACCGTGAGCCGGGTCACTGACATGTGGGTCCCACGTGTCAGTTAATTCTTTAATTCATTTATTTTCCGGAAAATCCTTCGCTGACGTCACCTTGCGCAATAATTAGAATTTCCTTTAGAAAAATAATTCAGGAAATTGTTAAATAACAGATTTAGGTTTAAATTTGTAAAATTCATAACTTTTGCATCCAAACTCCAAATTGGGTGTTTCAAATTTC
