# Supplementary material for: LTR retrotransposon-derived novel lncRNA2 enhances cold tolerance in Moso bamboo by modulating antioxidant activity and photosynthetic efficiency
Source: PeerJ journal article supplement (doi:10.7717/peerj.19056), 2025-02-26
Supplement: Supplemental_Table_S3.xlsx [file Supplemental_Table_S3.xlsx]

## Sheet: Sheet1
The normalized free energy of Pe-TElncRNA2 and mRNA pairing sites
Query	Length_Query	Target	Length_Target	dG	ndG	Start_Position_Query	End_Position_Query	Start_Position_Target	End_Position_Target
Pe-TElncRNA2	522	PH01000759G0260	1596	-87.17	-0.166992	1	130	1467	1596
		PH01004681G0060	1899	-58.33	-0.111743	1	341	1559	1899
		PH01002800G0200	4167	-54.8	-0.104981	1	522	139	660
		PH01002016G0280	1356	-52.58	-0.100728	1	522	316	837
