# Supplementary material for: LTR retrotransposon-derived novel lncRNA2 enhances cold tolerance in Moso bamboo by modulating antioxidant activity and photosynthetic efficiency
Source: PeerJ journal article supplement (doi:10.7717/peerj.19056), 2025-02-26
Supplement: Supplemental_Table_S4.xlsx [file Supplemental_Table_S4.xlsx]

## Sheet: Sheet1
lncRNA_information
lncRNA	ID	Gene_Type	Chromosome	Start	End	Strand	Exon_number	Length	ORF	DE	CK_1_fpkm	CK_2_fpkm	CK_3_fpkm	C4_1_fpkm	C4_2_fpkm	C4_3_fpkm	UV_vs_CK.log2(foldchange)	UV_vs_CK.pvalue	UV_vs_CK.-regulated
Pe-TElncRNA2	MSTRG.1287188.1	lincRNA	PH01004968	16954	17569	+	2	616	3	C4	0.118861	0.087917	0.133806	0.457202	0.545343	0.741254	2.38312	0.0229668	up
Gene_information
Gene_ID	Gene_Description	Chromosome	Start	End	Strand	Exon_number	Length	ORF
PH01000759G0260	PREDICTED: protein FIZZY-RELATED 2-like isoform X3 [Setaria italica]
PH01004681G0060	hypothetical protein OB_ABa0085D15.2 [Oryza barthii]
PH01002800G0200	putative PDR-like ABC transporter [Oryza sativa Japonica Group]
PH01002016G0280	hypothetical protein OsI_11000 [Oryza sativa Indica Group]
Arabidopsis homologous gene information
GeneID	mRNA ID	Protein	TAIR	NCBI GeneID	protein_id

## Sheet: Sheet2
lncRNA_information
lncRNA	ID	Gene_Type	Chromosome	Start	End	Strand	Exon_number	Length	ORF	DE	CK_1_fpkm	CK_2_fpkm	CK_3_fpkm	C4_1_fpkm	C4_2_fpkm	C4_3_fpkm	UV_vs_CK.log2(foldchange)	UV_vs_CK.pvalue	UV_vs_CK.-regulated
Pe-TElncRNA2	MSTRG.1287188.1	lincRNA	PH01004968	16954	17569	+	2	616	3	C4	0.118861	0.087917	0.133806	0.457202	0.545343	0.741254	2.38312	0.0229668	up
Gene_information
Gene_ID	Gene_Description	Chromosome	Start	End	Strand	Exon_number	Length
PH01000759G0260	protein FIZZY-RELATED 2-like isoform X3 [Setaria italica]	PH01000759	191353	198437	-	11	1596
PH01004681G0060	CCR4-NOT transcription complex subunit 3 [Oryza barthii]	PH01004681	32260	38039	+	10	1899
PH01002800G0200	putative PDR-like ABC transporter [Oryza sativa Japonica Group]	PH01002800	119793	128850	+	24	4167
PH01002016G0280	GTPase-activating protein (GAP) for ADP ribosylation factor (ARF) [Oryza sativa Indica Group]	PH01002016	147607	151826	+	3	1356
Arabidopsis homologous gene information
GeneID	mRNA ID	Protein	TAIR
PH01000759G0260	PH01000759G0260	FIZZY-RELATED 2-like isoform X3	AT4G22910.1
PH01004681G0060	PH01004681G0060	CCR4-NOT transcription complex subunit 3	AT5G18230.4
PH01002800G0200	PH01002800G0200	PDR-like ABC transporter	AT1G15520.1
PH01002016G0280	PH01002016G0280	GTPase-activating protein (GAP) for ADP ribosylation factor (ARF)	AT3G53710.3
