# Supplementary material for: LTR retrotransposon-derived novel lncRNA2 enhances cold tolerance in Moso bamboo by modulating antioxidant activity and photosynthetic efficiency
Source: PeerJ journal article supplement (doi:10.7717/peerj.19056), 2025-02-26
Supplement: Supplemental_Table_S5.xlsx [file Supplemental_Table_S5.xlsx]

## Sheet: Sheet1
Sample	Cq
Pe-TElncRNA2-Root-1	29.35
Pe-TElncRNA2-Root-2	29.4
Pe-TElncRNA2-Root-3	29.39
Pe-TElncRNA2-Stem-1	28.83
Pe-TElncRNA2-Stem-2	28.4
Pe-TElncRNA2-Stem-3	28.66
Pe-TElncRNA2-Leaf-1	29.45
Pe-TElncRNA2-Leaf-2	29.52
Pe-TElncRNA2-Leaf-3	29.58
Pe-TElncRNA2-Bud-1	29.23
Pe-TElncRNA2-Bud-2	29.34
Pe-TElncRNA2-Bud-3	29.32
NTB-Root-1	21.9
NTB-Root-2	22.08
NTB-Root-3	22.01
NTB-Stem-1	21.98
NTB-Stem-2	21.84
NTB-Stem-3	21.83
NTB-Leaf-1	21.66
NTB-Leaf-2	21.93
NTB-Leaf-3	21.86
NTB-Bud-1	22.03
NTB-Bud-2	22.03
NTB-Bud-3	22.07
PheACT-Nucleus-1	34.31
PheACT-Nucleus-2	34.11
PheACT-Nucleus-3	34.21
PheACT-Cytoplasm-1	35.41
PheACT-Cytoplasm-2	35.89
PheACT-Cytoplasm-3	35.15
PheEFla-Nucleus-1	35.28
PheEFla-Nucleus-2	33.9
PheEFla-Nucleus-3	35.61
PheEFla-Cytoplasm-1	30.14
PheEFla-Cytoplasm-2	30.12
PheEFla-Cytoplasm-3	30.36
Pe-TElncRNA2-Nucleus-1	32.07
Pe-TElncRNA2-Nucleus-2	32.13
Pe-TElncRNA2-Nucleus-3	32.1
Pe-TElncRNA2-Cytoplasm-1	30.67
Pe-TElncRNA2-Cytoplasm-2	30.58
Pe-TElncRNA2-Cytoplasm-3	30.85
Pe-TElncRNA2-C4-0h-1	34.63
Pe-TElncRNA2-C4-0h-2	35.63
Pe-TElncRNA2-C4-0h-3	34.31
Pe-TElncRNA2-C4-8h-1	29.06
Pe-TElncRNA2-C4-8h-2	29.77
Pe-TElncRNA2-C4-8h-3	29.8
Pe-TElncRNA2-C4-16h-1	33.59
Pe-TElncRNA2-C4-16h-2	33.33
Pe-TElncRNA2-C4-16h-3	32.31
Pe-TElncRNA2-C4-24h-1	30.86
Pe-TElncRNA2-C4-24h-2	30.83
Pe-TElncRNA2-C4-24h-3	30.69
Pe-TElncRNA2-C4-32h-1	32.79
Pe-TElncRNA2-C4-32h-2	33.85
Pe-TElncRNA2-C4-32h-3	33.07
Pe-FZR2-C4-0h-1	30.54
Pe-FZR2-C4-0h-2	30.64
Pe-FZR2-C4-0h-3	29.84
Pe-FZR2-C4-8h-1	25.11
Pe-FZR2-C4-8h-2	25.16
Pe-FZR2-C4-8h-3	25.04
Pe-FZR2-C4-16h-1	28.25
Pe-FZR2-C4-16h-2	28.32
Pe-FZR2-C4-16h-3	28.18
Pe-FZR2-C4-24h-1	27.38
Pe-FZR2-C4-24h-2	27.31
Pe-FZR2-C4-24h-3	27.25
Pe-FZR2-C4-32h-1	27.87
Pe-FZR2-C4-32h-2	28.04
Pe-FZR2-C4-32h-3	27.91
Pe-NOT3-C4-0h-1	29.32
Pe-NOT3-C4-0h-2	29.23
Pe-NOT3-C4-0h-3	29.33
Pe-NOT3-C4-8h-1	23.03
Pe-NOT3-C4-8h-2	23.02
Pe-NOT3-C4-8h-3	23.04
Pe-NOT3-C4-16h-1	26.22
Pe-NOT3-C4-16h-2	26.12
Pe-NOT3-C4-16h-3	26.1
Pe-NOT3-C4-24h-1	24.86
Pe-NOT3-C4-24h-2	24.89
Pe-NOT3-C4-24h-3	25.04
Pe-NOT3-C4-32h-1	26.22
Pe-NOT3-C4-32h-2	26.45
Pe-NOT3-C4-32h-3	26.26
Pe-ABCG44-C4-0h-1	30.89
Pe-ABCG44-C4-0h-2	30.88
Pe-ABCG44-C4-0h-3	30.76
Pe-ABCG44-C4-8h-1	24.6
Pe-ABCG44-C4-8h-2	24.46
Pe-ABCG44-C4-8h-3	24.61
Pe-ABCG44-C4-16h-1	26.42
Pe-ABCG44-C4-16h-2	26.5
Pe-ABCG44-C4-16h-3	26.48
Pe-ABCG44-C4-24h-1	25.38
Pe-ABCG44-C4-24h-2	25.54
Pe-ABCG44-C4-24h-3	25.67
Pe-ABCG44-C4-32h-1	26.01
Pe-ABCG44-C4-32h-2	25.89
Pe-ABCG44-C4-32h-3	26.02
Pe-AGD6-C4-0h-1	29.53
Pe-AGD6-C4-0h-2	29.43
Pe-AGD6-C4-0h-3	29.57
Pe-AGD6-C4-8h-1	24.27
Pe-AGD6-C4-8h-2	24.22
Pe-AGD6-C4-8h-3	24.24
Pe-AGD6-C4-16h-1	26.48
Pe-AGD6-C4-16h-2	26.59
Pe-AGD6-C4-16h-3	26.68
Pe-AGD6-C4-24h-1	25.46
Pe-AGD6-C4-24h-2	25.39
Pe-AGD6-C4-24h-3	25.52
Pe-AGD6-C4-32h-1	26.39
Pe-AGD6-C4-32h-2	26.27
Pe-AGD6-C4-32h-3	26.07
pUBQ10-C4-0h-1	37.03
pUBQ10-C4-0h-2	37.85
pUBQ10-C4-0h-3	38.34
pUBQ10-C4-4h-1	38.14
pUBQ10-C4-4h-2	39.67
pUBQ10-C4-4h-3	38.48
Pe-TElncRNA2-C4-0h-1	30.13
Pe-TElncRNA2-C4-0h-2	29.82
Pe-TElncRNA2-C4-0h-3	30.32
Pe-TElncRNA2-C4-4h-1	32.1
Pe-TElncRNA2-C4-4h-2	32.29
Pe-TElncRNA2-C4-4h-3	32.11
Pe-FZR2-C4-0h-1	34.32
Pe-FZR2-C4-0h-2	33.83
Pe-FZR2-C4-0h-3	33.84
Pe-FZR2-C4-4h-1	34.66
Pe-FZR2-C4-4h-2	34.52
Pe-FZR2-C4-4h-3	34.63
Pe-NOT3-C4-0h-1	31.1
Pe-NOT3-C4-0h-2	31.3
Pe-NOT3-C4-0h-3	31.11
Pe-NOT3-C4-4h-1	31.14
Pe-NOT3-C4-4h-2	31.35
Pe-NOT3-C4-4h-3	31.32
Pe-ABCG44-C4-0h-1	30.07
Pe-ABCG44-C4-0h-2	30.1
Pe-ABCG44-C4-0h-3	29.98
Pe-ABCG44-C4-4h-1	30.79
Pe-ABCG44-C4-4h-2	31.08
Pe-ABCG44-C4-4h-3	31.15
Pe-AGD6-C4-0h-1	30.34
Pe-AGD6-C4-0h-2	30.51
Pe-AGD6-C4-0h-3	30.54
Pe-AGD6-C4-4h-1	30.44
Pe-AGD6-C4-4h-2	30.45
Pe-AGD6-C4-4h-3	31.13
NTB-C4-0h-1	28.22
NTB-C4-0h-2	28.31
NTB-C4-0h-3	28.19
NTB-C4-4h-1	26.92
NTB-C4-4h-2	27.26
NTB-C4-4h-3	27.93
Pe-TElncRNA2-CK-0D-1	33.61
Pe-TElncRNA2-CK-0D-2	33.49
Pe-TElncRNA2-CK-0D-3	34.04
Pe-TElncRNA2-CK-0D-1	29.8
Pe-TElncRNA2-OE1-0D-2	29.98
Pe-TElncRNA2-OE1-0D-3	29.99
Pe-TElncRNA2-OE2-0D-1	30.86
Pe-TElncRNA2-OE2-0D-2	30.94
Pe-TElncRNA2-OE2-0D-3	30.89
Pe-TElncRNA2-OE3-0D-1	33.03
Pe-TElncRNA2-OE3-0D-2	33.09
Pe-TElncRNA2-OE3-0D-3	32.95
Pe-TElncRNA2-CK-2D-1	30.98
Pe-TElncRNA2-CK-2D-2	32.02
Pe-TElncRNA2-CK-2D-3	32.34
Pe-TElncRNA2-OE1-2D-1	29.56
Pe-TElncRNA2-OE1-2D-2	29.9
Pe-TElncRNA2-OE1-2D-3	29.93
Pe-TElncRNA2-OE2-2D-1	31.03
Pe-TElncRNA2-OE2-2D-2	31.06
Pe-TElncRNA2-OE2-2D-3	31.21
Pe-TElncRNA2-OE3-2D-1	30.77
Pe-TElncRNA2-OE3-2D-2	31.08
Pe-TElncRNA2-OE3-2D-3	30.92
Pe-TElncRNA2-CK-4D-1	35.16
Pe-TElncRNA2-CK-4D-2	35.04
Pe-TElncRNA2-CK-4D-3	34.04
Pe-TElncRNA2-OE1-4D-1	31.02
Pe-TElncRNA2-OE1-4D-2	32.18
Pe-TElncRNA2-OE1-4D-3	31.6
Pe-TElncRNA2-OE2-4D-1	33.03
Pe-TElncRNA2-OE2-4D-2	33.09
Pe-TElncRNA2-OE2-4D-3	32.95
Pe-TElncRNA2-OE3-4D-1	32.15
Pe-TElncRNA2-OE3-4D-2	32.36
Pe-TElncRNA2-OE3-4D-3	32.2
ACTIN2-CK-0D-1	15.42
ACTIN2-CK-0D-2	15.39
ACTIN2-CK-0D-3	15.42
ACTIN2-OE1-0D-1	17.34
ACTIN2-OE1-0D-2	17.17
ACTIN2-OE1-0D-3	17.33
ACTIN2-OE2-0D-1	17.14
ACTIN2-OE2-0D-2	16.49
ACTIN2-OE2-0D-3	17.12
ACTIN2-OE3-0D-1	16.86
ACTIN2-OE3-0D-2	16.75
ACTIN2-OE3-0D-3	16.85
ACTIN2-CK-2D-1	18.2
ACTIN2-CK-2D-2	18.21
ACTIN2-CK-2D-3	18
ACTIN2-OE1-2D-1	18.71
ACTIN2-OE1-2D-2	18.44
ACTIN2-OE1-2D-3	18.64
ACTIN2-OE2-2D-1	18.41
ACTIN2-OE2-2D-2	18.36
ACTIN2-OE2-2D-3	18.36
ACTIN2-OE3-2D-1	18.21
ACTIN2-OE3-2D-2	18.23
ACTIN2-OE3-2D-3	18.16
ACTIN2-CK-4D-1	17.96
ACTIN2-CK-4D-2	17.96
ACTIN2-CK-4D-3	18.2
ACTIN2-OE1-4D-1	17.2
ACTIN2-OE1-4D-2	17.36
ACTIN2-OE1-4D-3	17.28
ACTIN2-OE2-4D-1	18.04
ACTIN2-OE2-4D-2	18.08
ACTIN2-OE2-4D-3	17.75
ACTIN2-OE3-4D-1	19
ACTIN2-OE3-4D-2	19.04
ACTIN2-OE3-4D-3	19.08
At-FZR2-CK-0D-1	30.16
At-FZR2-CK-0D-2	30.24
At-FZR2-CK-0D-3	30.32
At-FZR2-OE1-0D-1	28.94
At-FZR2-OE1-0D-2	29.03
At-FZR2-OE1-0D-3	28.98
At-FZR2-OE2-0D-1	29.87
At-FZR2-OE2-0D-2	29.8
At-FZR2-OE2-0D-3	29.95
At-FZR2-OE3-0D-1	30.14
At-FZR2-OE3-0D-2	30.16
At-FZR2-OE3-0D-3	30.09
At-FZR2-CK-2D-1	26.88
At-FZR2-CK-2D-2	26.95
At-FZR2-CK-2D-3	26.84
At-FZR2-OE1-2D-1	27.25
At-FZR2-OE1-2D-2	27.34
At-FZR2-OE1-2D-3	27.32
At-FZR2-OE2-2D-1	26.73
At-FZR2-OE2-2D-2	26.73
At-FZR2-OE2-2D-3	26.82
At-FZR2-OE3-2D-1	27.46
At-FZR2-OE3-2D-2	27.44
At-FZR2-OE3-2D-3	27.48
At-FZR2-CK-4D-1	26.82
At-FZR2-CK-4D-2	27.55
At-FZR2-CK-4D-3	27.58
At-FZR2-OE1-4D-1	28.56
At-FZR2-OE1-4D-2	28.51
At-FZR2-OE1-4D-3	28.46
At-FZR2-OE2-4D-1	26.7
At-FZR2-OE2-4D-2	26.73
At-FZR2-OE2-4D-3	26.63
At-FZR2-OE3-4D-1	28.48
At-FZR2-OE3-4D-2	28.62
At-FZR2-OE3-4D-3	28.55
ACTIN2-CK-0D-1	15.51
ACTIN2-CK-0D-2	15.3
ACTIN2-CK-0D-3	15.74
ACTIN2-OE1-0D-1	16.91
ACTIN2-OE1-0D-2	17.08
ACTIN2-OE1-0D-3	16.99
ACTIN2-OE2-0D-1	16.09
ACTIN2-OE2-0D-2	16.04
ACTIN2-OE2-0D-3	15.95
ACTIN2-OE3-0D-1	16.88
ACTIN2-OE3-0D-2	17.11
ACTIN2-OE3-0D-3	17.16
ACTIN2-CK-2D-1	11.28
ACTIN2-CK-2D-2	11.22
ACTIN2-CK-2D-3	11.18
ACTIN2-OE1-2D-1	17.57
ACTIN2-OE1-2D-2	17.59
ACTIN2-OE1-2D-3	17.54
ACTIN2-OE2-2D-1	16.74
ACTIN2-OE2-2D-2	16.61
ACTIN2-OE2-2D-3	16.71
ACTIN2-OE3-2D-1	14.65
ACTIN2-OE3-2D-2	14.66
ACTIN2-OE3-2D-3	14.71
ACTIN2-CK-4D-1	16.91
ACTIN2-CK-4D-2	17.07
ACTIN2-CK-4D-3	17.14
ACTIN2-OE1-4D-1	17.87
ACTIN2-OE1-4D-2	17.89
ACTIN2-OE1-4D-3	17.87
ACTIN2-OE2-4D-1	17.2
ACTIN2-OE2-4D-2	17.32
ACTIN2-OE2-4D-3	17.25
ACTIN2-OE3-4D-1	18.01
ACTIN2-OE3-4D-2	17.68
ACTIN2-OE3-4D-3	17.94
At-NOT3-CK-0D-1	25.63
At-NOT3-CK-0D-2	25.66
At-NOT3-CK-0D-3	25.89
At-NOT3-OE1-0D-1	24.81
At-NOT3-OE1-0D-2	24.88
At-NOT3-OE1-0D-3	24.97
At-NOT3-OE2-0D-1	25.12
At-NOT3-OE2-0D-2	25.06
At-NOT3-OE2-0D-3	25.16
At-NOT3-OE3-0D-1	25.24
At-NOT3-OE3-0D-2	25.22
At-NOT3-OE3-0D-3	25.17
At-NOT3-CK-2D-1	24.62
At-NOT3-CK-2D-2	24.6
At-NOT3-CK-2D-3	24.58
At-NOT3-OE1-2D-1	24.65
At-NOT3-OE1-2D-2	24.71
At-NOT3-OE1-2D-3	24.72
At-NOT3-OE2-2D-1	25.07
At-NOT3-OE2-2D-2	25.08
At-NOT3-OE2-2D-3	25.02
At-NOT3-OE3-2D-1	23.73
At-NOT3-OE3-2D-2	23.7
At-NOT3-OE3-2D-3	23.75
At-NOT3-CK-4D-1	24.54
At-NOT3-CK-4D-2	24.83
At-NOT3-CK-4D-3	24.54
At-NOT3-OE1-4D-1	25.39
At-NOT3-OE1-4D-2	25.4
At-NOT3-OE1-4D-3	25.31
At-NOT3-OE2-4D-1	24.66
At-NOT3-OE2-4D-2	24.59
At-NOT3-OE2-4D-3	24.58
At-NOT3-OE3-4D-1	24.1
At-NOT3-OE3-4D-2	24.21
At-NOT3-OE3-4D-3	24.17
ACTIN2-CK-0D-1	16.67
ACTIN2-CK-0D-2	16.8
ACTIN2-CK-0D-3	16.82
ACTIN2-OE1-0D-1	16.35
ACTIN2-OE1-0D-2	16.84
ACTIN2-OE1-0D-3	16.88
ACTIN2-OE2-0D-1	16.67
ACTIN2-OE2-0D-2	16.58
ACTIN2-OE2-0D-3	16.71
ACTIN2-OE3-0D-1	17.28
ACTIN2-OE3-0D-2	17.33
ACTIN2-OE3-0D-3	17.24
ACTIN2-CK-2D-1	14.92
ACTIN2-CK-2D-2	15
ACTIN2-CK-2D-3	14.91
ACTIN2-OE1-2D-1	18.54
ACTIN2-OE1-2D-2	18.23
ACTIN2-OE1-2D-3	18.26
ACTIN2-OE2-2D-1	18.19
ACTIN2-OE2-2D-2	18.21
ACTIN2-OE2-2D-3	18.2
ACTIN2-OE3-2D-1	16.02
ACTIN2-OE3-2D-2	15.94
ACTIN2-OE3-2D-3	16
ACTIN2-CK-4D-1	18.24
ACTIN2-CK-4D-2	18.28
ACTIN2-CK-4D-3	17.37
ACTIN2-OE1-4D-1	18.46
ACTIN2-OE1-4D-2	18.35
ACTIN2-OE1-4D-3	18.18
ACTIN2-OE2-4D-1	17.32
ACTIN2-OE2-4D-2	17.56
ACTIN2-OE2-4D-3	17.55
ACTIN2-OE3-4D-1	17.37
ACTIN2-OE3-4D-2	17.36
ACTIN2-OE3-4D-3	17.42
At-ABCG44-CK-0D-1	31.02
At-ABCG44-CK-0D-2	31.27
At-ABCG44-CK-0D-3	31.27
At-ABCG44-OE1-0D-1	27.31
At-ABCG44-OE1-0D-2	27.36
At-ABCG44-OE1-0D-3	27.35
At-ABCG44-OE2-0D-1	26.15
At-ABCG44-OE2-0D-2	26.05
At-ABCG44-OE2-0D-3	26.17
At-ABCG44-OE3-0D-1	26.26
At-ABCG44-OE3-0D-2	26.27
At-ABCG44-OE3-0D-3	26.9
At-ABCG44-CK-2D-1	25.41
At-ABCG44-CK-2D-2	25.32
At-ABCG44-CK-2D-3	25.41
At-ABCG44-OE1-2D-1	26.47
At-ABCG44-OE1-2D-2	26.47
At-ABCG44-OE1-2D-3	26.48
At-ABCG44-OE2-2D-1	28.17
At-ABCG44-OE2-2D-2	28.39
At-ABCG44-OE2-2D-3	28.29
At-ABCG44-OE3-2D-1	29.12
At-ABCG44-OE3-2D-2	29.02
At-ABCG44-OE3-2D-3	29.13
At-ABCG44-CK-4D-1	26.87
At-ABCG44-CK-4D-2	26.89
At-ABCG44-CK-4D-3	26.8
At-ABCG44-OE1-4D-1	26.06
At-ABCG44-OE1-4D-2	25.98
At-ABCG44-OE1-4D-3	25.88
At-ABCG44-OE2-4D-1	27.09
At-ABCG44-OE2-4D-2	26.97
At-ABCG44-OE2-4D-3	26.86
At-ABCG44-OE3-4D-1	27.3
At-ABCG44-OE3-4D-2	27.26
At-ABCG44-OE3-4D-3	27.16
ACTIN2-CK-0D-1	16.36
ACTIN2-CK-0D-2	16.37
ACTIN2-CK-0D-3	16.34
ACTIN2-OE1-0D-1	17.58
ACTIN2-OE1-0D-2	17.87
ACTIN2-OE1-0D-3	17.74
ACTIN2-OE2-0D-1	17.07
ACTIN2-OE2-0D-2	17.3
ACTIN2-OE2-0D-3	17.44
ACTIN2-OE3-0D-1	16
ACTIN2-OE3-0D-2	15.86
ACTIN2-OE3-0D-3	15.8
ACTIN2-CK-2D-1	14.72
ACTIN2-CK-2D-2	14.72
ACTIN2-CK-2D-3	14.67
ACTIN2-OE1-2D-1	15.72
ACTIN2-OE1-2D-2	15.25
ACTIN2-OE1-2D-3	15.51
ACTIN2-OE2-2D-1	17.04
ACTIN2-OE2-2D-2	16.97
ACTIN2-OE2-2D-3	16.94
ACTIN2-OE3-2D-1	16.83
ACTIN2-OE3-2D-2	16.82
ACTIN2-OE3-2D-3	16.69
ACTIN2-CK-4D-1	17.61
ACTIN2-CK-4D-2	17.63
ACTIN2-CK-4D-3	17.64
ACTIN2-OE1-4D-1	17.71
ACTIN2-OE1-4D-2	17.78
ACTIN2-OE1-4D-3	17.81
ACTIN2-OE2-4D-1	17.09
ACTIN2-OE2-4D-2	17.01
ACTIN2-OE2-4D-3	17.06
ACTIN2-OE3-4D-1	16.85
ACTIN2-OE3-4D-2	16.75
ACTIN2-OE3-4D-3	16.92
At-AGD6-CK-0D-1	25.77
At-AGD6-CK-0D-2	25.85
At-AGD6-CK-0D-3	25.81
At-AGD6-OE1-0D-1	24.53
At-AGD6-OE1-0D-2	24.62
At-AGD6-OE1-0D-3	24.6
At-AGD6-OE2-0D-1	25.16
At-AGD6-OE2-0D-2	25.17
At-AGD6-OE2-0D-3	25.21
At-AGD6-OE3-0D-1	24.29
At-AGD6-OE3-0D-2	24.3
At-AGD6-OE3-0D-3	24.32
At-AGD6-CK-2D-1	24.02
At-AGD6-CK-2D-2	24.01
At-AGD6-CK-2D-3	24.07
At-AGD6-OE1-2D-1	24.57
At-AGD6-OE1-2D-2	24.68
At-AGD6-OE1-2D-3	24.74
At-AGD6-OE2-2D-1	24.71
At-AGD6-OE2-2D-2	24.79
At-AGD6-OE2-2D-3	24.72
At-AGD6-OE3-2D-1	25.56
At-AGD6-OE3-2D-2	25.52
At-AGD6-OE3-2D-3	25.48
At-AGD6-CK-4D-1	24.51
At-AGD6-CK-4D-2	24.36
At-AGD6-CK-4D-3	24.33
At-AGD6-OE1-4D-1	25.68
At-AGD6-OE1-4D-2	25.68
At-AGD6-OE1-4D-3	25.65
At-AGD6-OE2-4D-1	24.32
At-AGD6-OE2-4D-2	24.19
At-AGD6-OE2-4D-3	24.06
At-AGD6-OE3-4D-1	25.38
At-AGD6-OE3-4D-2	25.58
At-AGD6-OE3-4D-3	25.48
ACTIN2-CK-0D-1	15.42
ACTIN2-CK-0D-2	15.39
ACTIN2-CK-0D-3	15.42
ACTIN2-OE1-0D-1	17.34
ACTIN2-OE1-0D-2	17.17
ACTIN2-OE1-0D-3	17.33
ACTIN2-OE2-0D-1	17.14
ACTIN2-OE2-0D-2	16.49
ACTIN2-OE2-0D-3	17.12
ACTIN2-OE3-0D-1	14.29
ACTIN2-OE3-0D-2	14.46
ACTIN2-OE3-0D-3	14.45
ACTIN2-CK-2D-1	13.1
ACTIN2-CK-2D-2	13.13
ACTIN2-CK-2D-3	13.13
ACTIN2-OE1-2D-1	18.43
ACTIN2-OE1-2D-2	18.4
ACTIN2-OE1-2D-3	18.43
ACTIN2-OE2-2D-1	18.03
ACTIN2-OE2-2D-2	18
ACTIN2-OE2-2D-3	18.02
ACTIN2-OE3-2D-1	16.86
ACTIN2-OE3-2D-2	16.75
ACTIN2-OE3-2D-3	16.85
ACTIN2-CK-4D-1	17.61
ACTIN2-CK-4D-2	17.85
ACTIN2-CK-4D-3	17.74
ACTIN2-OE1-4D-1	17.27
ACTIN2-OE1-4D-2	17.35
ACTIN2-OE1-4D-3	17.5
ACTIN2-OE2-4D-1	16.26
ACTIN2-OE2-4D-2	16.36
ACTIN2-OE2-4D-3	16.29
ACTIN2-OE3-4D-1	18.19
ACTIN2-OE3-4D-2	18.18
ACTIN2-OE3-4D-3	18.09
