# Supplementary material for: LTR retrotransposon-derived novel lncRNA2 enhances cold tolerance in Moso bamboo by modulating antioxidant activity and photosynthetic efficiency
Source: PeerJ journal article supplement (doi:10.7717/peerj.19056), 2025-02-26
Supplement: Supplemental_Table_S6.xlsx [file Supplemental_Table_S6.xlsx]

## Sheet: Sheet1
SOD content（U/g FW）							MDA content（μg/g FW）
	WT	OE1	OE2	OE3				WT	OE1	OE2	OE3
CK1	226.957	200.878	233.448	205.393			CK1	125.875	157.786	126.874	107.366
CK2	215.066	227.423	200.779	228.339			CK2	122.88	175.181	120.346	117.043
CK3	213.918	226.145	223.145	201.034			CK3	138.47	140.39	114.97	112.205
C4-2D-1	322.974	340.121	327.989	333.098			C4-2D-1	488.371	1236.22	1409.43	1163.75
C4-2D-2	337.941	345.459	343.053	322.46			C4-2D-2	495.514	1204.95	1215.16	1241.11
C4-2D-3	321.095	342.79	307.973	325.038			C4-2D-3	491.942	1179.8	1369.5	1202.43
C4-4D-1	377.868	387.36	439.96	415.372			C4-4D-1	854.4	1520.23	1524.23	1550.53
C4-4D-2	340.121	398.424	398.708	403.098			C4-4D-2	994.278	1574.42	1496.59	1505.67
C4-4D-3	378.492	420.393	395.162	399.923			C4-4D-3	908.39	1519.23	1545.86	1529.37
MDA content（μg/g FW）							The maximum photochemical efficiency PS Ⅱ (Fv/Fm)
	WT	OE1	OE2	OE3				WT	OE1	OE2	OE3
CK1	4.7472	5.2632	6	6.6048			CK1	0.813	0.813	0.824	0.806
CK2	5.676	7.9464	7.4304	6.9144			CK2	0.81	0.807	0.817	0.812
CK3	5.2116	6.8112	7.4304	6.2952			CK3	0.8145	0.8214	0.821	0.8
C4-2D-1	12.1776	6.8112	7.4304	9.3912			C4-2D-1	0.525	0.723	0.729	0.7309
C4-2D-2	12.9	9.3396	9.9072	11.6616			C4-2D-2	0.506	0.668	0.68	0.747
C4-2D-3	12.5388	8.0754	7.6368	10.9392			C4-2D-3	0.599	0.666	0.7462	0.698
C4-4D-1	22.188	14.1384	22.704	22.4976			C4-4D-1	0.431	0.637	0.637	0.593
C4-4D-2	21.7752	14.7576	16.512	20.64			C4-4D-2	0.369	0.644	0.634	0.662
C4-4D-3	22.6008	11.4552	17.7504	21.156			C4-4D-3	0.455	0.6555	0.6484	0.682
