# Supplementary material for: LTR retrotransposon-derived novel lncRNA2 enhances cold tolerance in Moso bamboo by modulating antioxidant activity and photosynthetic efficiency
Source: PeerJ journal article supplement (doi:10.7717/peerj.19056), 2025-02-26
Supplement: Supplemental_Table_S7.xlsx [file Supplemental_Table_S7.xlsx]

## Sheet: Sheet1
ID	Chromosome	Start	End	Relation to TE	Start	End
MSTRG.1287188.1	PH01004968	16954	17569	repeat_TE1983347(被包含)	12969	24696
